# Supplementary material for: Synthesis, Crystal Structure, and Electrochemistry of Mono- and Bis-Homoannular Ferrocene Derivatives
Source: MDPI journal article supplement (doi:10.3390/cryst14020141), 2024-01-30

Supporting information  
Figure S1.  $^1\text{H}$  NMR of **3a**.

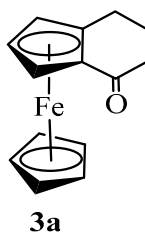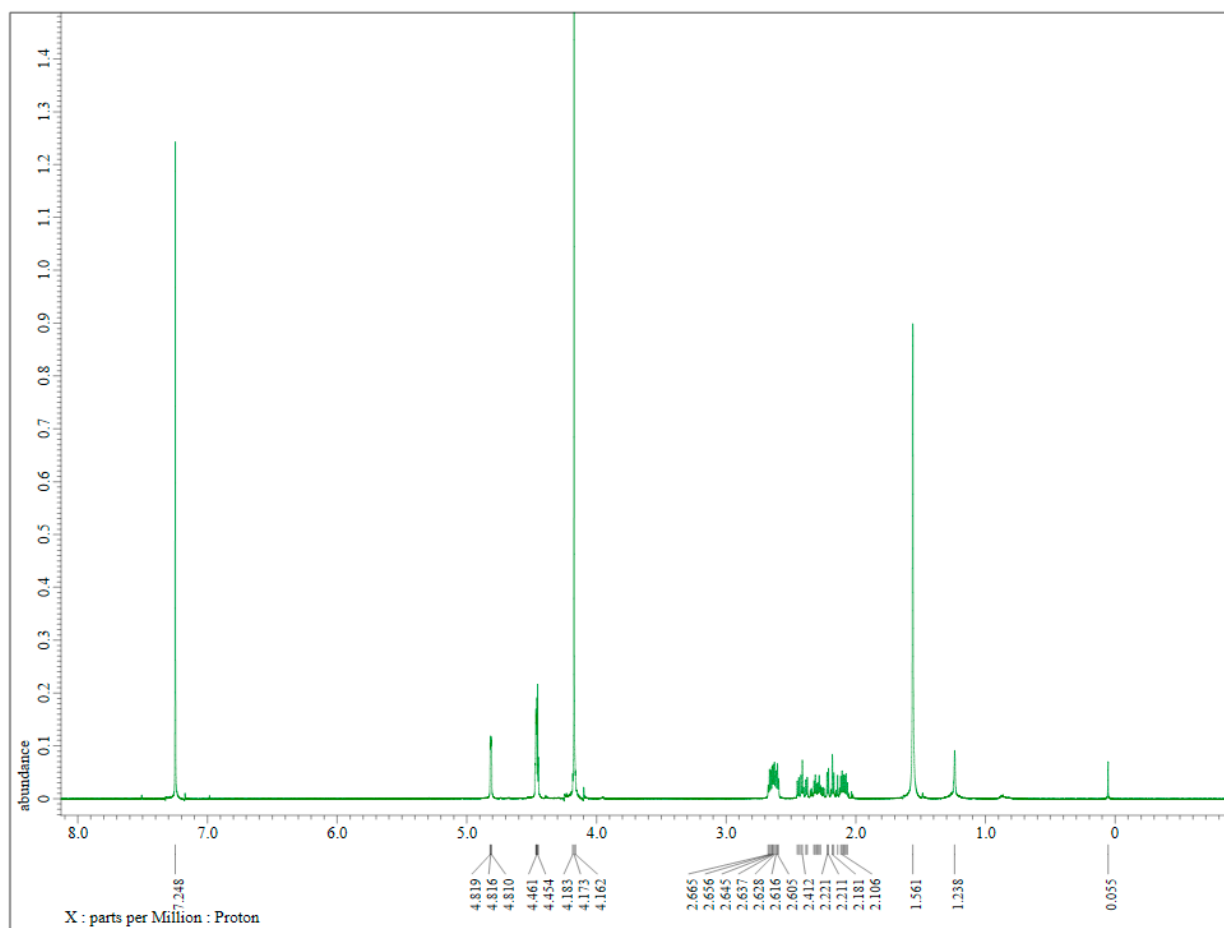

**Figure S2.**  $^{13}\text{C}$  NMR of **3a**.

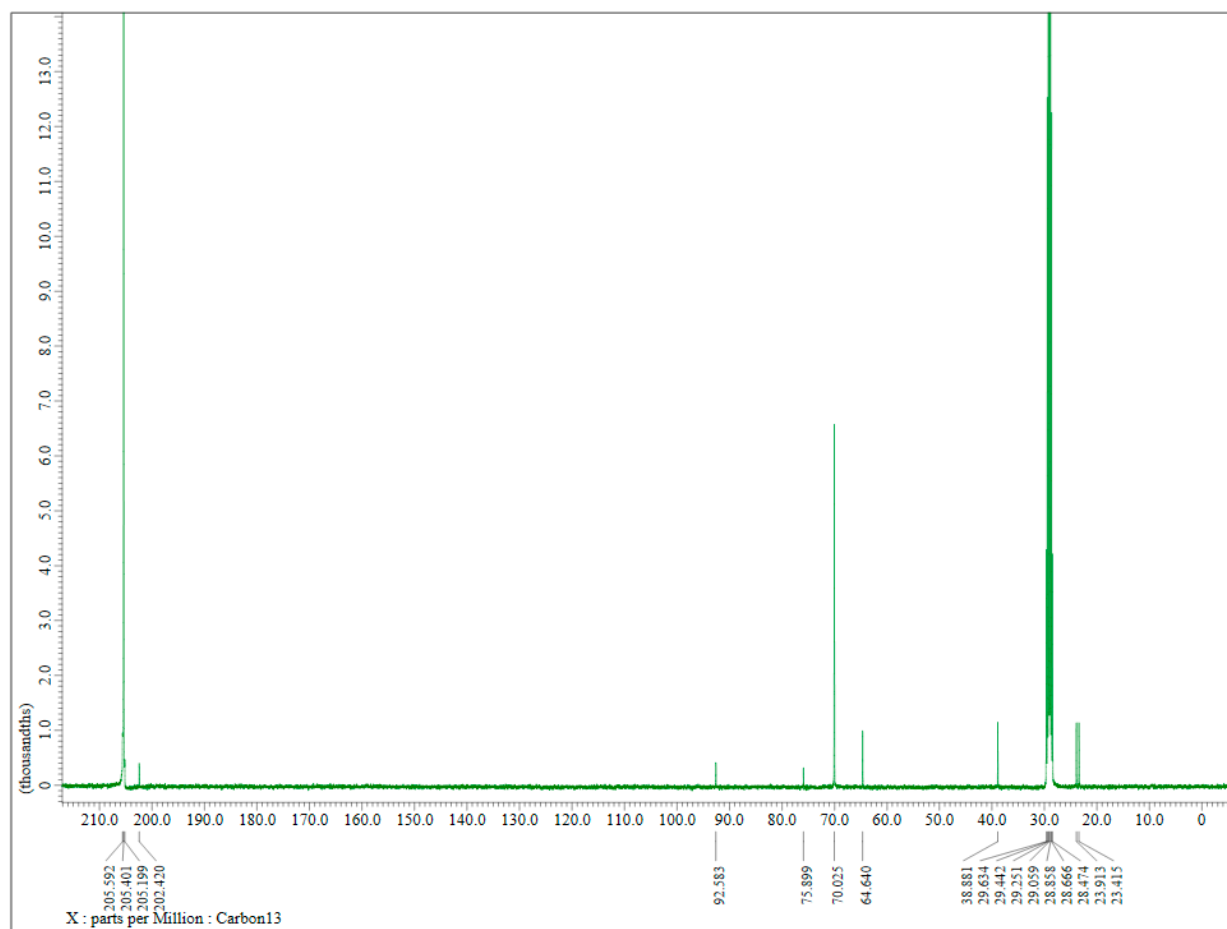

**Figure S3.** IR spectrum of **3a**.

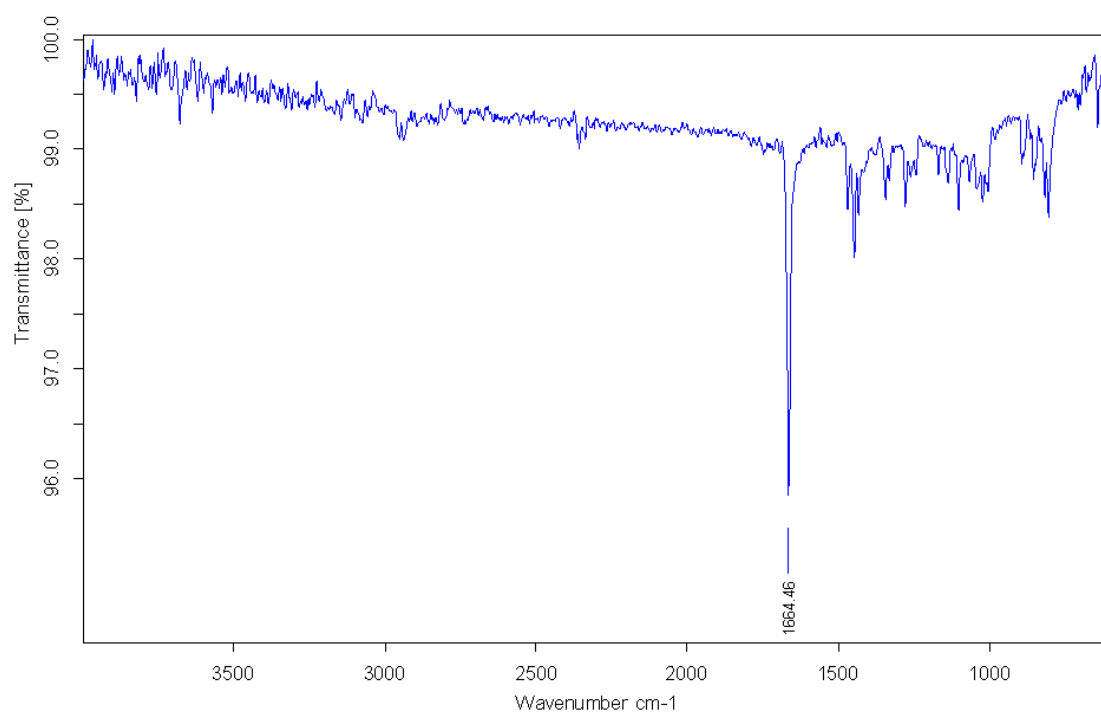

**Figure S4.**  $^1\text{H}$  NMR of **3b**.

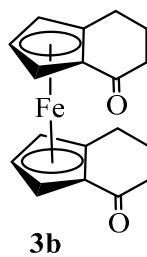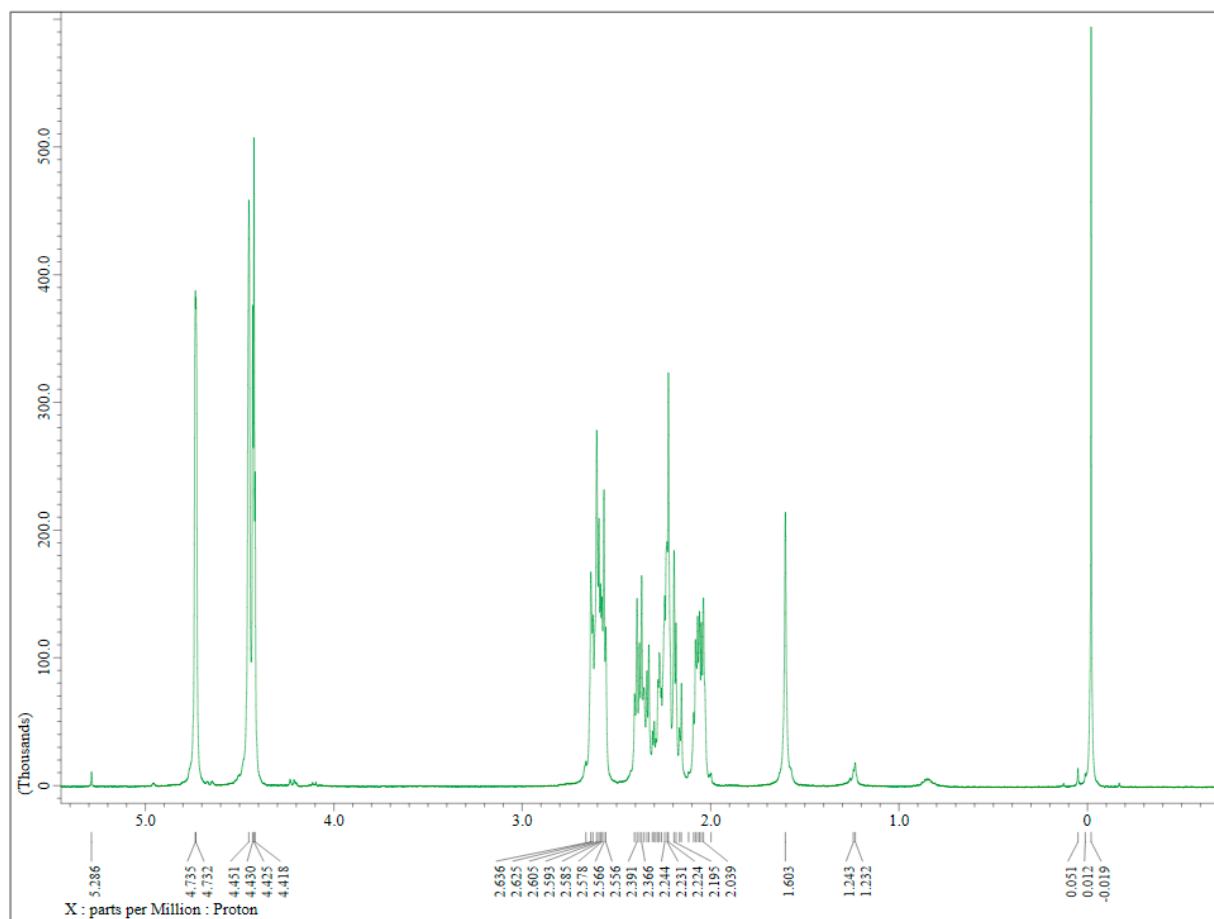

**Figure S5.**  $^{13}\text{C}$  NMR of **3b**.

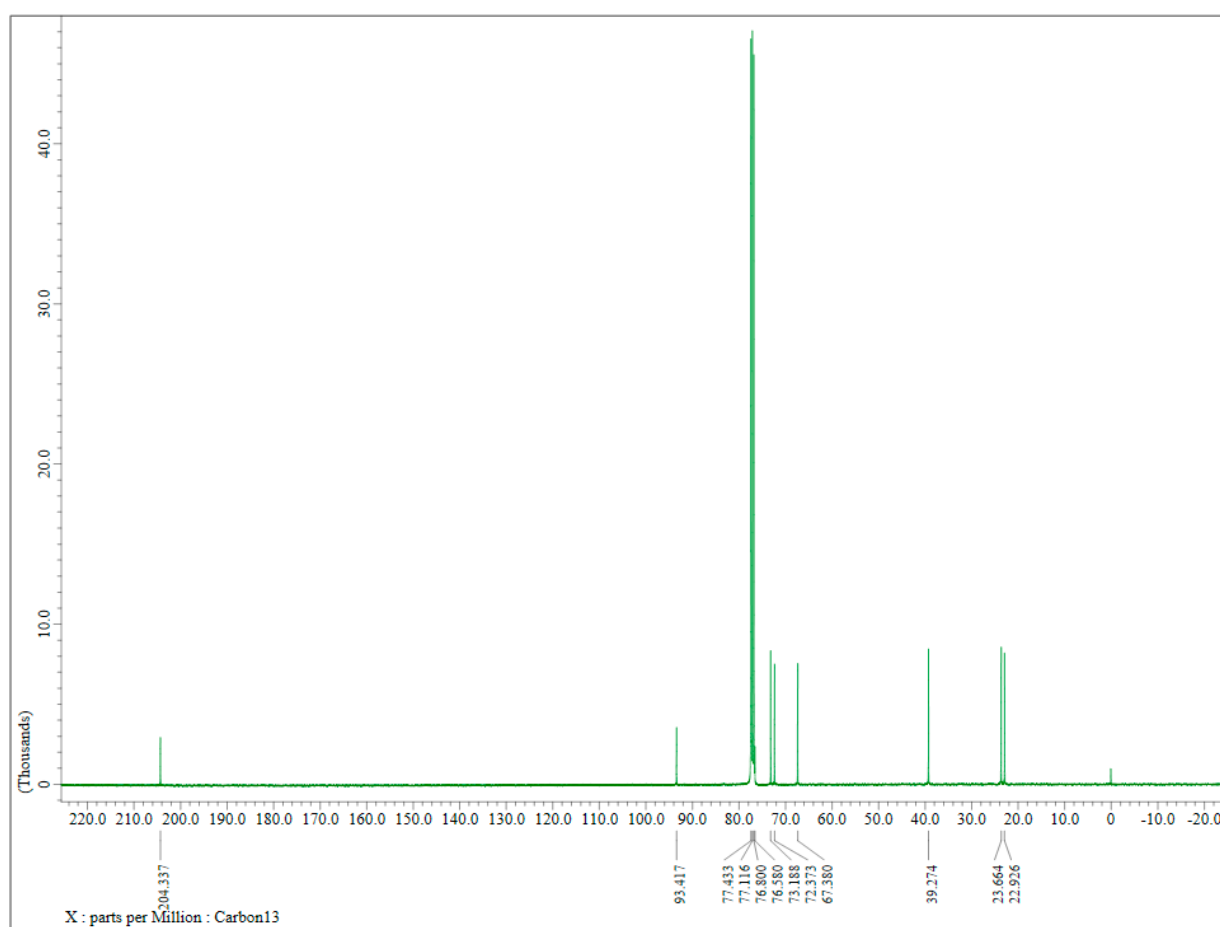

**Figure S6.** IR spectrum of **3b**.

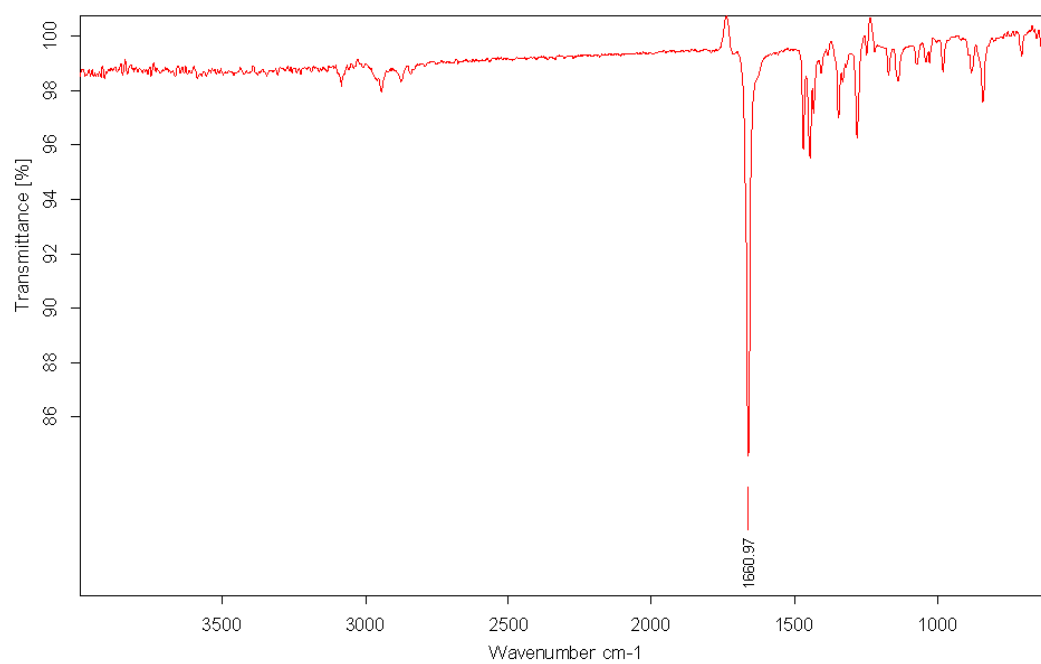

**Figure S7.**  $^1\text{H}$  NMR of **3b'**.

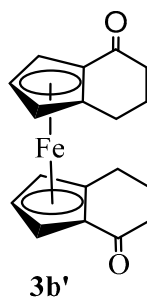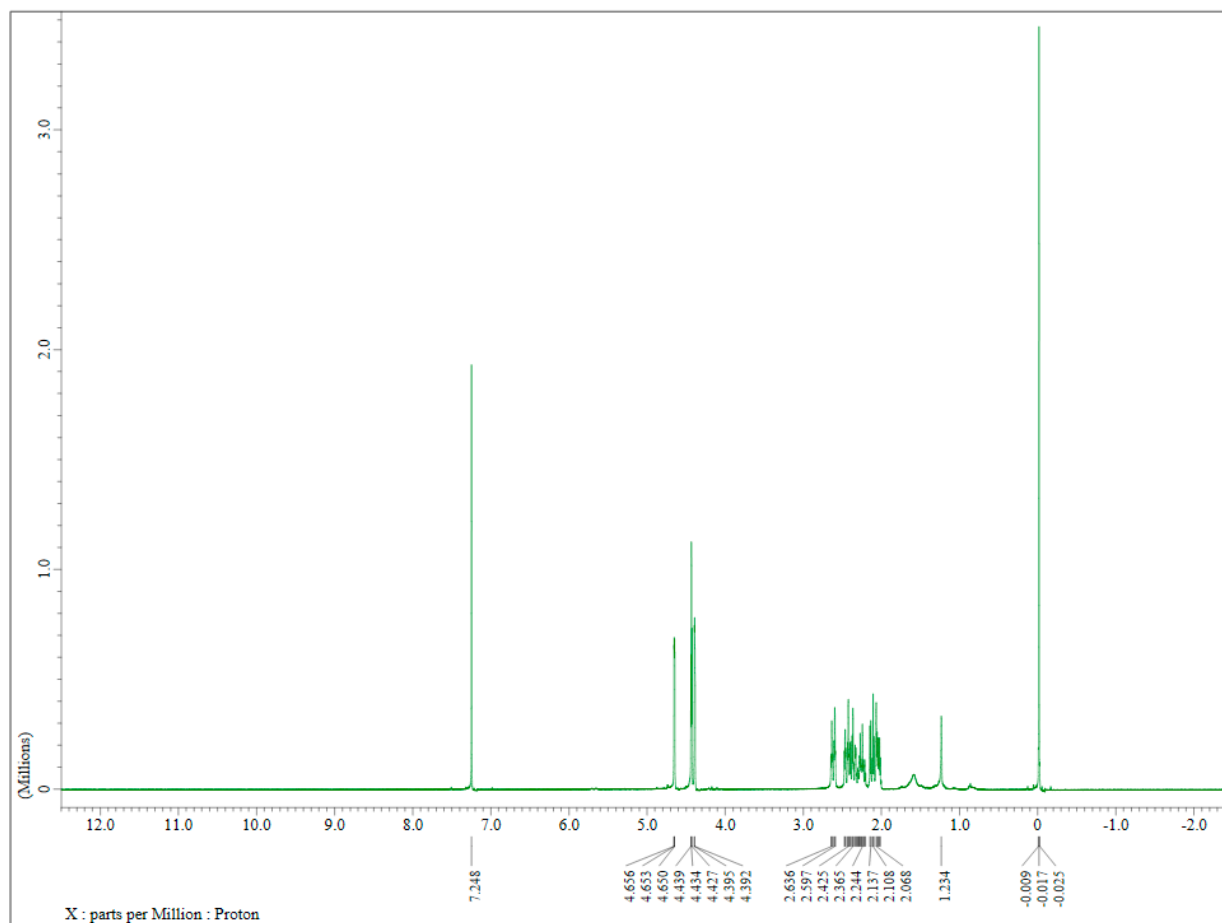

**Figure S8.**  $^{13}\text{C}$  NMR of **3b'**.

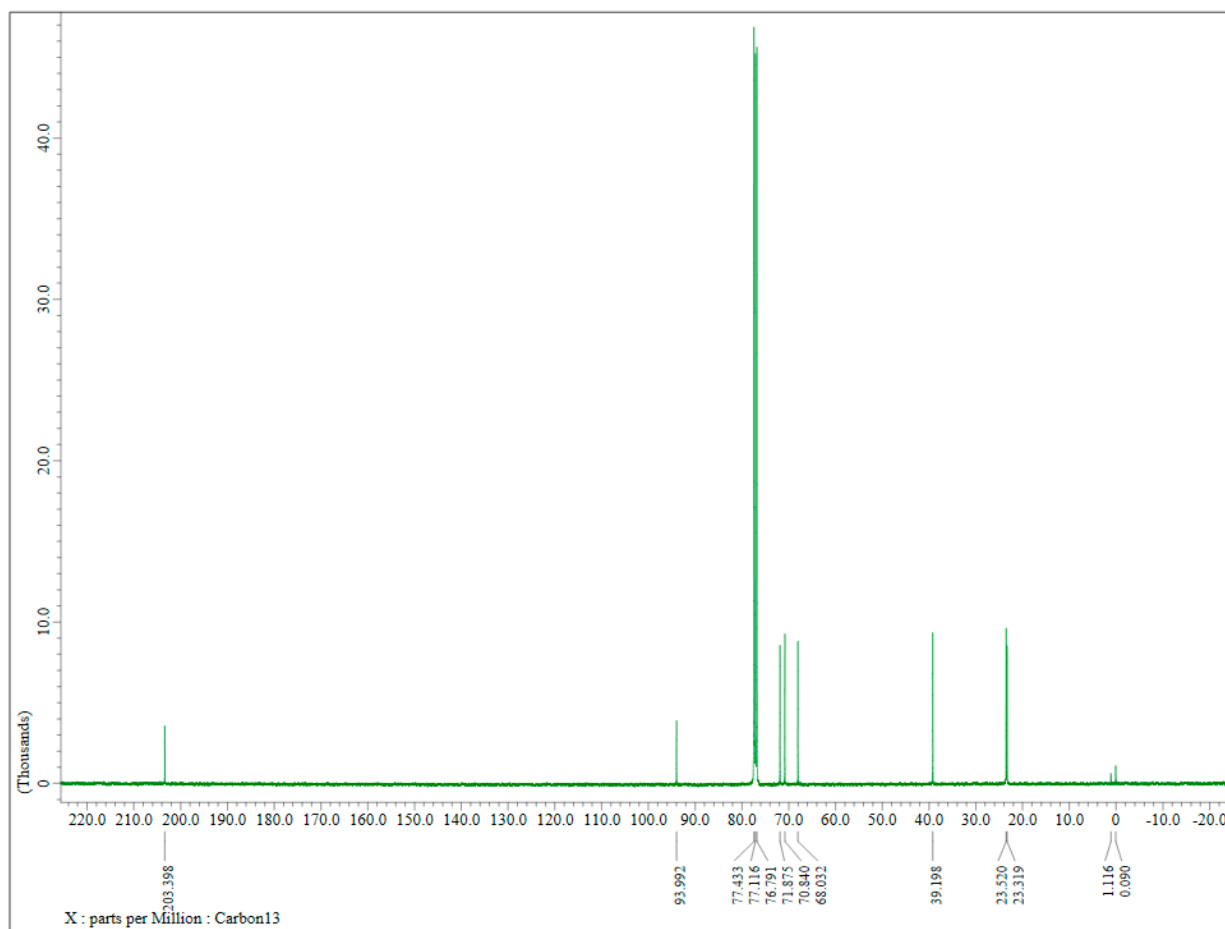

**Figure S9.** IR spectrum of **3b'**.

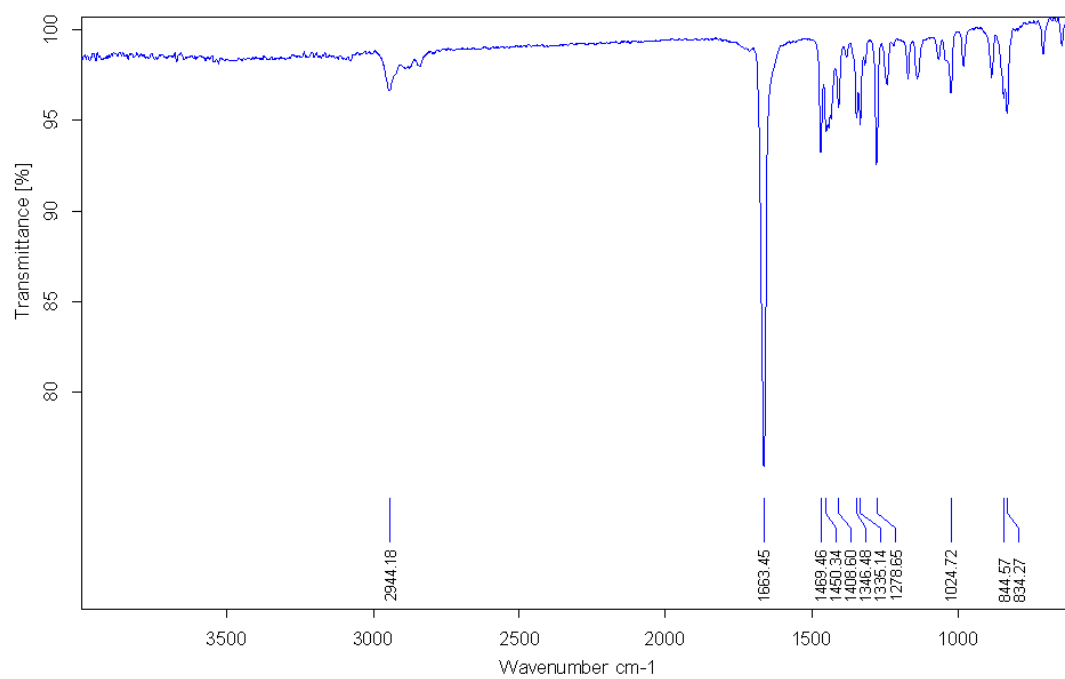

**Figure S10.**  $^1\text{H}$  NMR of **4a**.

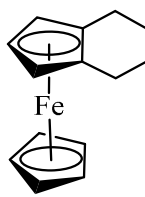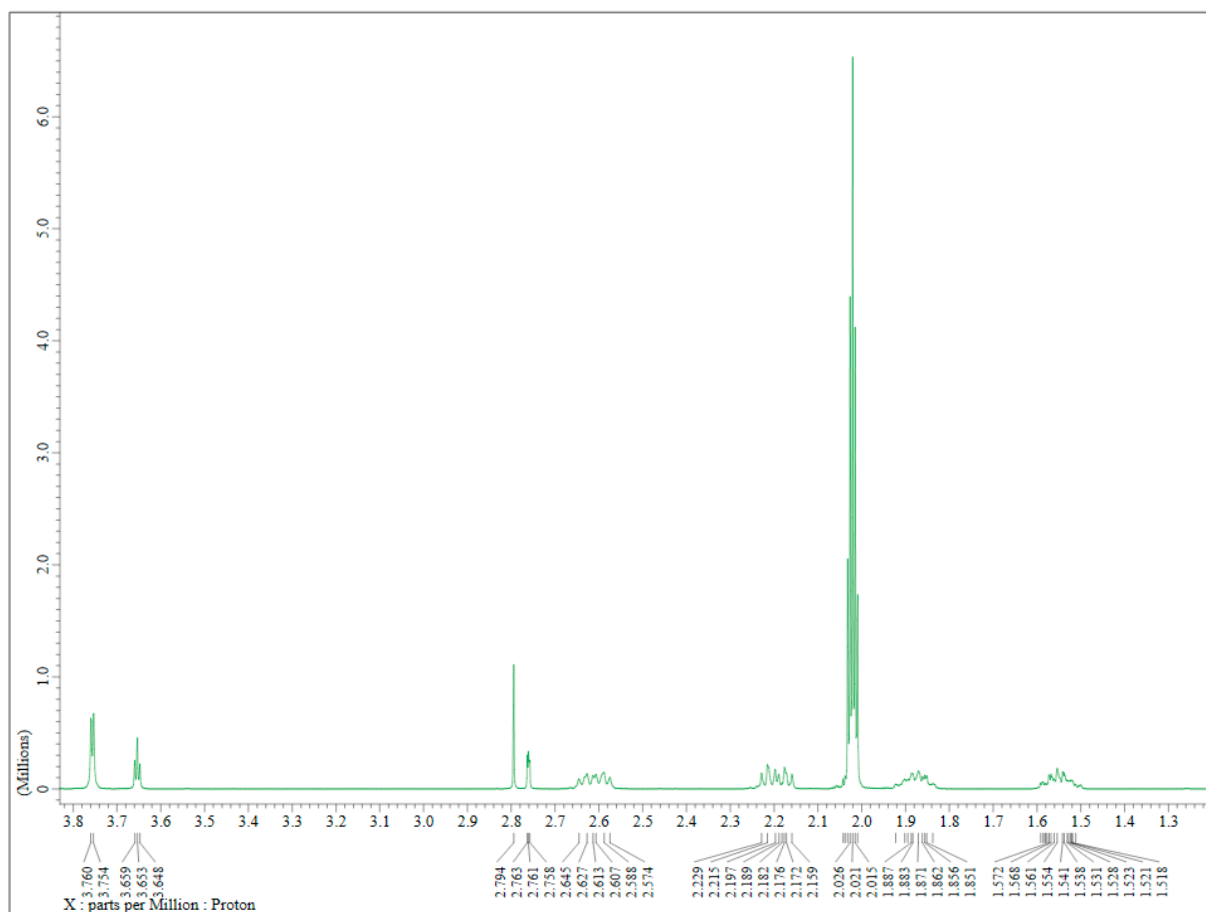

**Figure S11.**  $^{13}\text{C}$  NMR of **4a**.

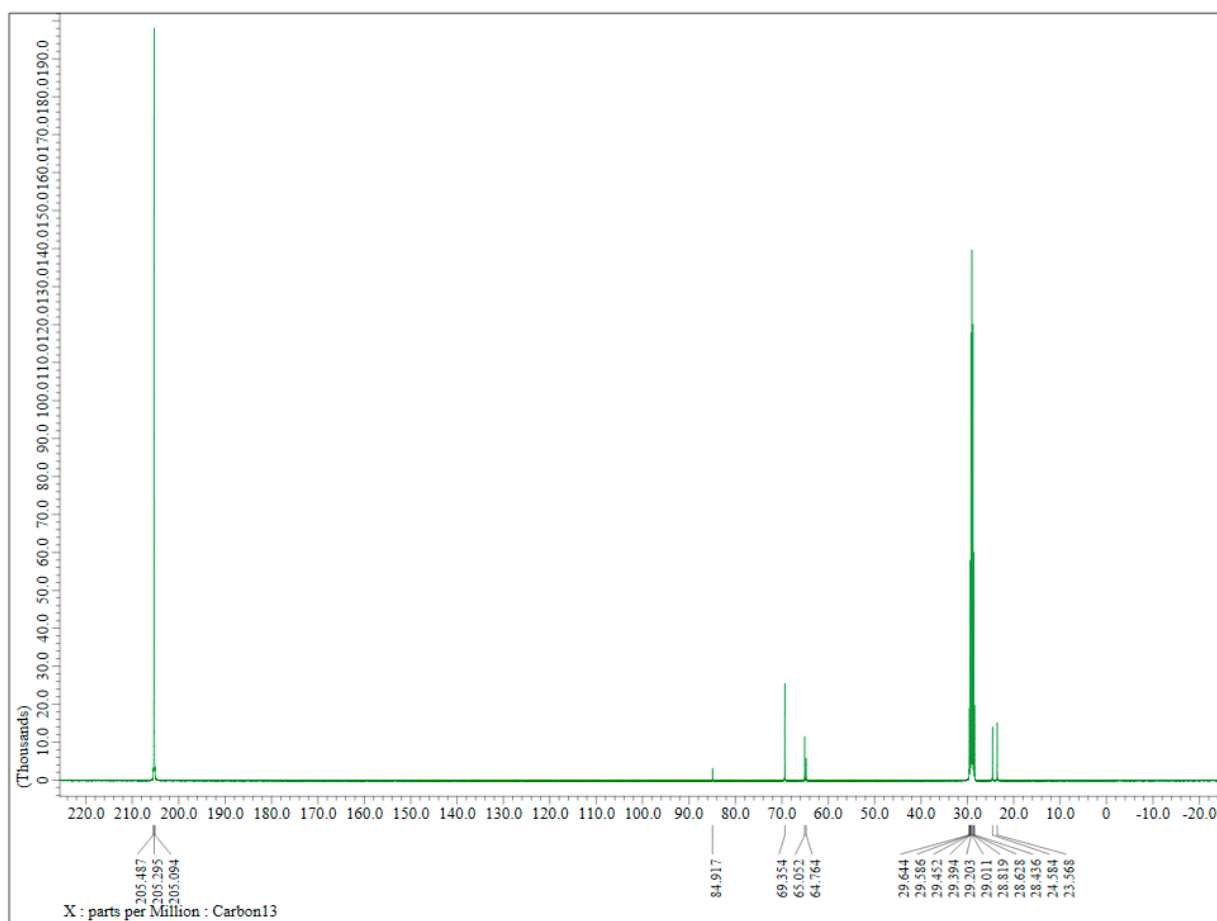



**Figure S12.**  $^1\text{H}$  NMR of **4b**.

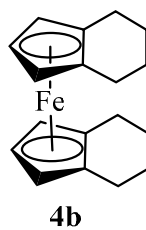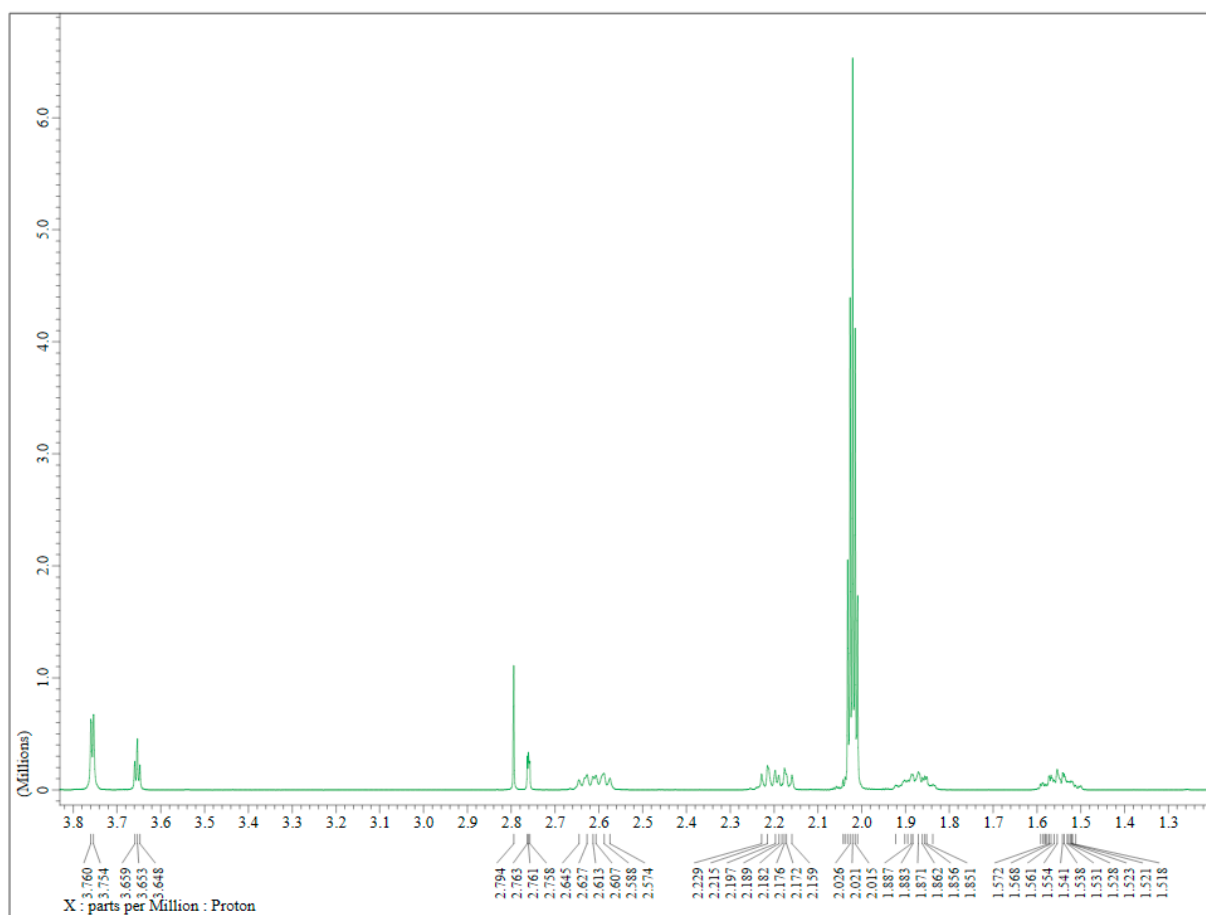

**Figure S13.**  $^{13}\text{C}$  NMR of **4b**

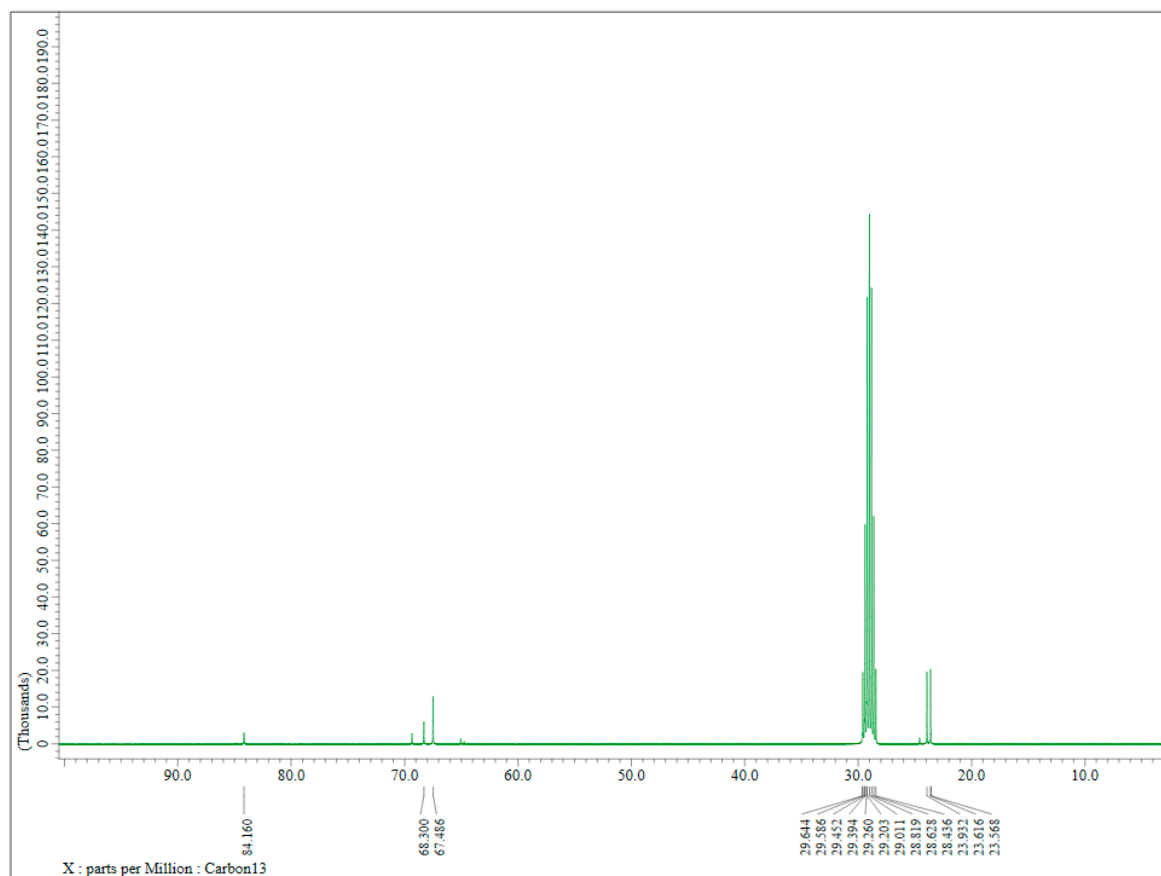

**Figure S14.** Packing diagram of **3b** along the *b* axis.

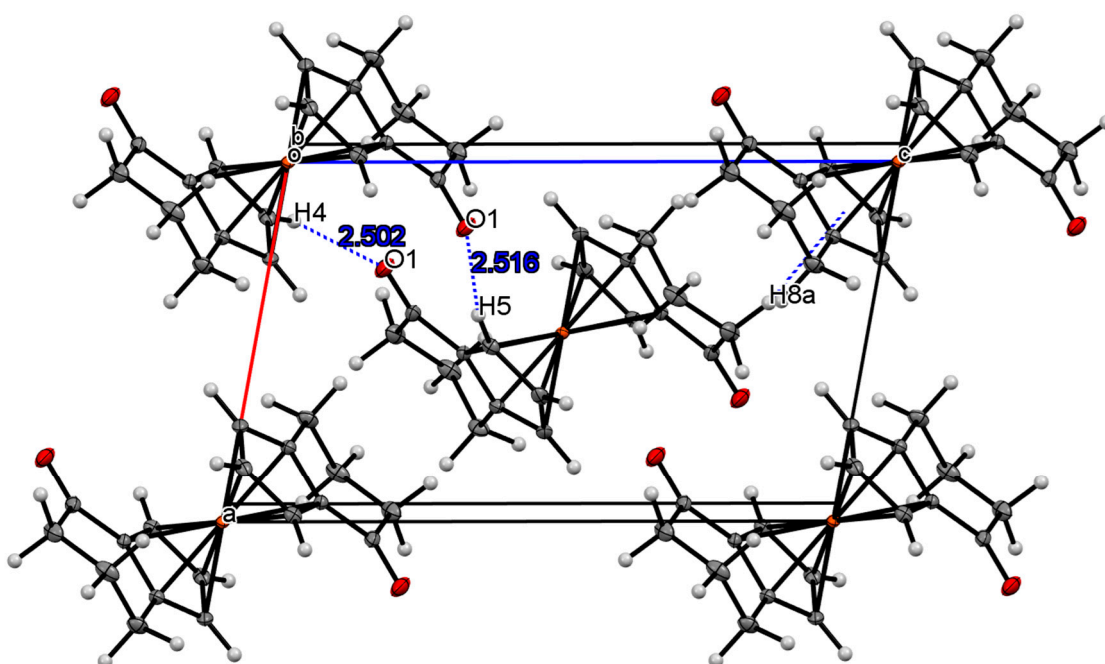

**Figure S15.** Packing diagram of **4a** along the *a* axis.

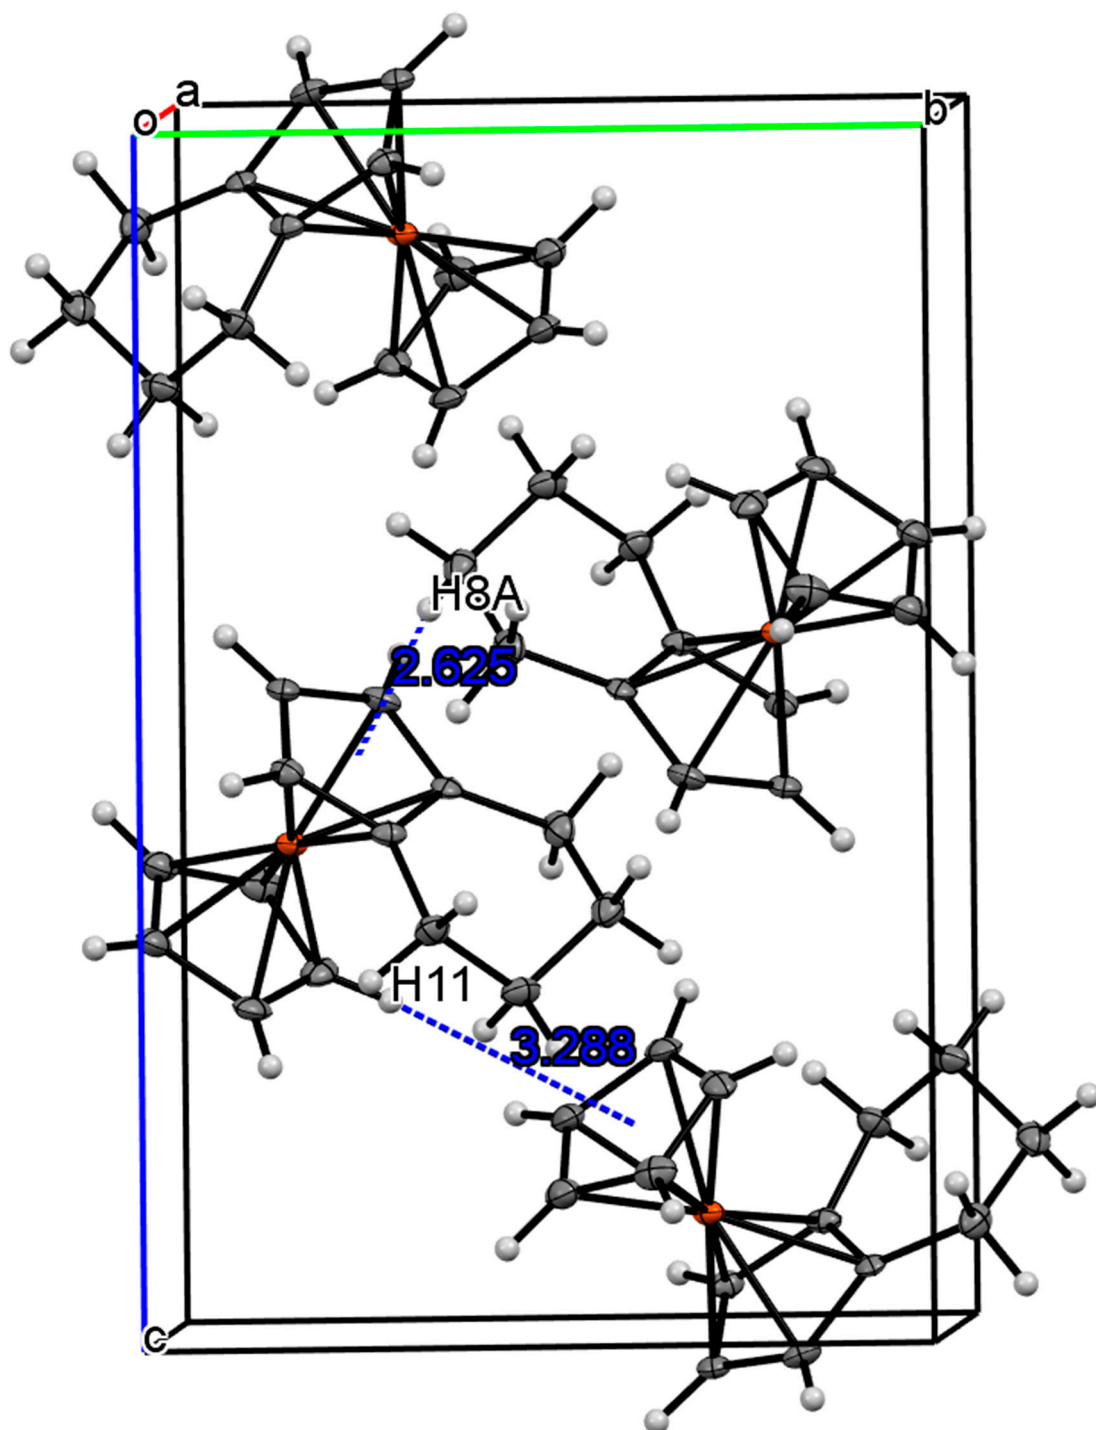

Supplement: s1 [file s1]
